# Supplementary material
Source: Springer Nature journal article supplement (https://www.springermedizin.de/resource/supplementary/13049_2010_158_MOESM4_ESM.pdf/9666004)

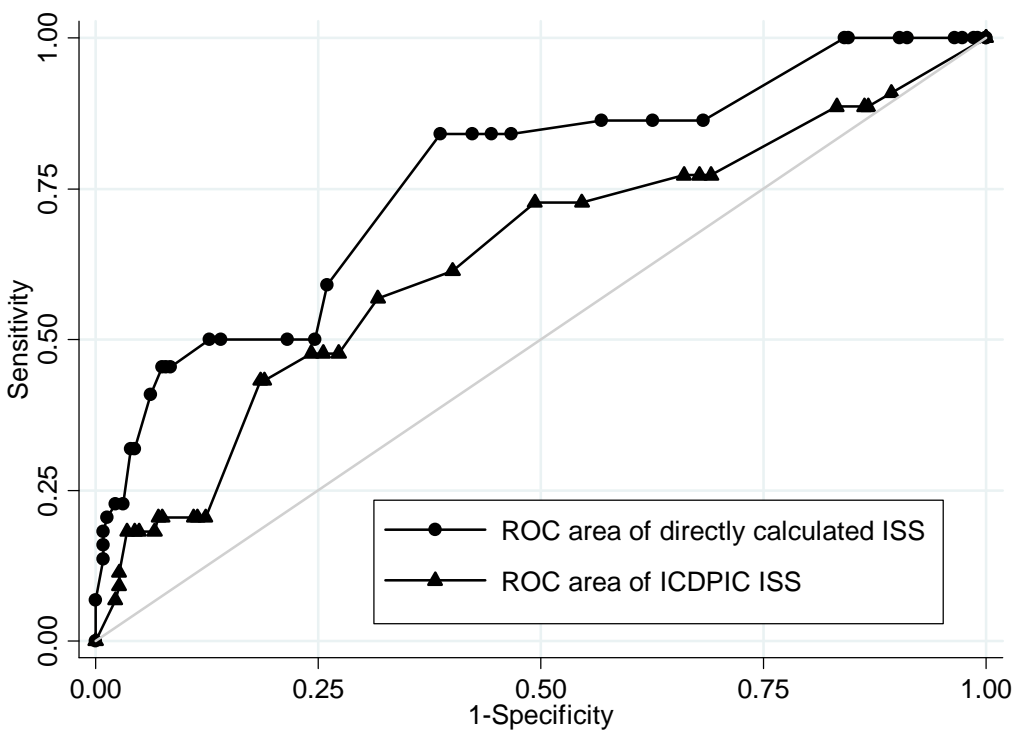

Supplement: MOESM4 [file 9666004]
